# Supplementary material
Source: Springer Nature journal article supplement (https://www.springermedizin.de/resource/supplementary/13054_2010_9372_MOESM2_ESM.pdf/9706108)

## Time distribution of ICU-acquired BSI

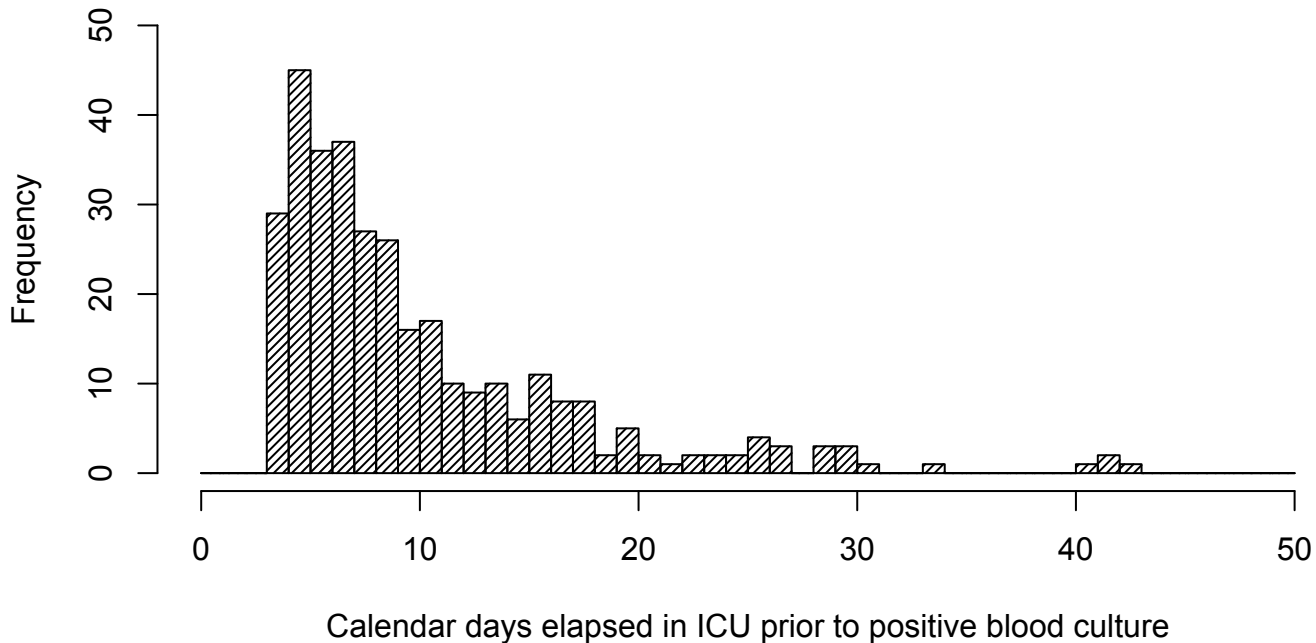

Supplement: MOESM2 [file 9706108]
